# Supplementary material for: Multiple, Distinct Intercontinental Lineages but Isolation of Australian Populations in a Cosmopolitan Lichen-Forming Fungal Taxon, Psora decipiens (Psoraceae, Ascomycota)
Source: Front Microbiol. 2018 Feb 23;9:283. doi: 10.3389/fmicb.2018.00283 (PMC5829036; doi:10.3389/fmicb.2018.00283)
Supplement: TABLE S1 — List of specimens included in this study. [file Data_Sheet_1.XLSX]

## Sheet: supplement_table_S1_17Jan2017
Nominal species	Candidate species	Labcode	Origin	Comment	ITS	LSU	MCM7	RPB1	mtSSU	TLC	Collector	Voucher	Lat.	Long.	Altitude (m.)
Psora crenata	p_cren_A	AY425634	USA, Arizona, Yavapai Co.		AY425634	-	-	-	-	not tested	Hertel, H.	Hertel 39964 (M 0066791)	NA	NA	NA
Psora crenata	p_cren_A	PS93	Mexico, Puebla		MG677168	MG677394	MG783595	-	-	norstictic	Rui, S. & Timdal, E.	10 Jan. 1991, Rui & Timdal 7358 (O L119808)	18.8333	–97.50	2350
Psora crenata	p_cren_A	PS95	Mexico, Baja California Sur		MG677169	MG677395	MG783596	MG783720	-	norstictic	Timdal, E.	17 Feb. 1993, Timdal SON20/04 (O L15430)	24.35	–111.0167	110
Psora crenata	p_cren_Ca	PS60	South Africa, Western Cape		MG677171	MG677397	MG783598	MG783721	-	4.5	Rui, S. & Timdal, E.	Rui & Timdal SA15/02B (O L184559)	–33.7093	22.2945	550
Psora crenata	p_cren_Ca	PS61	South Africa, Western Cape		MG677172	MG677398	MG783599	MG783722	-	none detected	Rui, S. & Timdal, E.	Rui & Timdal SA09/06B (O L184552)	–33.5443	21.2277	460
Psora crenata	p_cren_Ca	PS62	South Africa, Western Cape		MG677173	MG677399	MG783600	MG783723	-	4,5,6 +?	Rui, S. & Timdal, E.	Rui & Timdal SA09/01 (O L142728)	–33.5433	21.2267	460
Psora crenata	p_cren_Ca	PS78	South Africa, Northern Cape		MG677174	MG677400	MG783601	MG783724	-	4,5,6 +?	Weber, B.	Weber s.n. (S F268256)	–30.2055	17.5565	NA
Psora crenata	p_cren_Ca	PS81	South Africa, Northern Cape		MG677175	MG677401	MG783602	MG783725	-	4,5,6 +?	Weber, B.	Weber s.n. (S F268255)	–30.2055	17.5565	NA
Psora crenata	p_cren_Ca	PS84	South Africa, Northern Cape		MG677176	MG677402	MG783603	MG783726	-	4,5,6 +?	Weber, B.	Weber s.n. (S F268253)	–30.2055	17.5565	NA
Psora crenata	p_cren_Ca	PS87	South Africa, Northern Cape		MG677177	MG677403	MG783604	MG783727	-	4,5,6 +?	Weber, B.	Weber s.n. (S F268261)	–30.2055	17.5565	NA
Psora crenata	p_cren_Ca	PS92	South Africa, Western Cape		MG677178	MG677404	MG783605	MG783728	-	4.5	Rui, S. & Timdal, E.	Rui & Timdal SA11/01B (O L184555)	–33.5493	21.8551	350
Psora crenata	p_cren_Cb	PS79	South Africa, Northern Cape		MG677179	MG677405	MG783606	MG783729	-	norstictic	Weber, B.	Weber s.n. (S F268254)	–30.2055	17.5565	NA
Psora crenata	p_cren_Cb	PS80	South Africa, Northern Cape		MG677180	MG677406	MG783607	MG783730	-	New chemotype	Weber, B.	Weber s.n. (S F268263)	–30.2055	17.5565	NA
Psora crenata	p_cren_Cb	PS82	South Africa, Northern Cape		MG677181	MG677407	MG783608	MG783731	-	norstictic + pigment	Weber, B.	Weber s.n. (S F268258)	–30.2055	17.5565	NA
Psora crenata	p_cren_Cb	PS83	South Africa, Northern Cape		MG677182	MG677408	MG783609	MG783732	-	New chemotype	Weber, B.	Weber s.n. (S F268262)	–30.2055	17.5565	NA
Psora crenata	p_cren_Cc	PS59	South Africa, Western Cape		MG677183	MG677409	MG783610	MG783733	MG677317	7.8	Rui, S. & Timdal, E.	Rui & Timdal SA10/01B (O L184553)	–33.5095	21.6598	325
Psora crenata	p_cren_Cc	PS85	South Africa, Northern Cape		MG677184	MG677410	MG783611	MG783734	-	none detected (?4 +)	Weber, B.	Weber s.n. (S F268257)	–30.2055	17.5565	NA
Psora crenata	p_cren_Cc	PS86	South Africa, Northern Cape		MG677185	MG677411	MG783612	MG783735	-	none detected	Weber, B.	Weber s.n. (S F268260)	–30.2055	17.5565	NA
Psora crenata	p_cren_Cc	PS88	South Africa, Northern Cape		MG677186	MG677412	MG783613	MG783736	-	none detected	Weber, B.	Weber s.n. (S F268259)	–30.2055	17.5565	NA
Psora crenata	p_cren_Cc	PS89	South Africa, Western Cape		MG677187	MG677413	MG783614	MG783737	-	7.8	Rui, S. & Timdal, E.	Rui & Timdal SA15/03B (O L184558)	–33.7093	22.2945	550
Psora crenata	p_cren_Cc	PS90	South Africa, Western Cape		MG677188	-	MG783615	MG783738	-	7.8	Rui, S. & Timdal, E.	Rui & Timdal SA11/03C (O L184557)	–33.5493	21.8551	350
Psora crenata	p_cren_Cc	PS91	South Africa, Western Cape		MG677189	MG677414	MG783616	MG783739	-	none detected	Rui, S. & Timdal, E.	Rui & Timdal SA10/01C (O L184554)	–33.5095	21.6598	325
Psora crenata	p_cren_Cc	PS94	South Africa, Western Cape		MG677191	MG677416	MG783617	MG783740	-	none detected	Rui, S. & Timdal, E.	Rui & Timdal SA11/02 (O L143065)	–33.5493	21.8551	350
Psora crenata	p_cren_A	ALM78	Mexico, San Luis Potosi		MG677167	MG677393	MG783594	MG783719	-	norstictic (more?)	Huber-Sannwald, E.	30 oct. 2008 Huber-Sannwald s.n. (S F279374)	23.6019	–100.9434	1960
Psora decipiens	clade 'A'	125	USA, Utah, Uinta Mountains		MG677207	-	-	-		not tested	Leavitt, S.D.	Leavitt 16.625 (BRY-C)	40.8957	-110.52	NA
Psora decipiens	clade 'A'	8626	USA, Colorado, Niwot Ridge Research Site		MG677192	MG677417	MG783618	MG783741	MG677318	not tested	Leavitt, S.D.	Leavitt 2013-CO-NR (BRY-C)	40.0533	-105.584	NA
Psora decipiens	clade 'A'	8789	USA, Oregon, Wallowa County		MG677193	MG677418	MG783619	MG783742	MG677319	not tested	Rosentreter, R.	R. Rosentreter 16097	45.23	-117.269	2410
Psora decipiens	clade 'A'	8791	USA, Colorado, Gunnison County		MG677194	-	MG783620	MG783743	MG677320	not tested	Rosentreter, R.	R. Rosentreter 16556	38.6856	-106.483	3700
Psora decipiens	clade 'A'	PS21	Italy, Piemonte, Verbano Cusio Ossola		MG677195	MG677419	MG783621	MG783744	MG677321	not tested	Westberg, M. & Fontaneto, D.	Westberg & Fontaneto s.n. (S F302602)	46.431	8.429	2250
Psora decipiens	clade 'A'	PS22	Sweden. Torne Lappmark, Karesuando par.		MG677196	MG677420	MG783622	MG783745	MG677322	not tested	Westberg, M.	Westberg P050 (S F214361)	68.9921	20.2559	940
Psora decipiens	clade 'A'	PS47	Norway, Nord-Trøndelag, Høylandet		MG677197	MG677421	MG783623	MG783746		none detected	Klepsland, J.	Klepsland JK11-L212 (O L177144)	64.6024	12.3671	170
Psora decipiens	clade 'A'	PS55	Norway, Oppland, Øyer		MG677198	MG677422	MG783624	MG783747	-	none detected	Breili, A.	Breili L3811 (O L159565)	61.2902	10.3227	380
Psora decipiens	clade 'A'	PS58	Norway, Nordland, Hattfjelldal		MG677199	MG677423	MG783625	-	-	none detected	Breili, A	Breili L-3245 (O L159315)	65.5964	14.2115	800
Psora decipiens	clade 'A'	PS65	Norway, Hedmark, Folldal		MG677200	MG677424	MG783626	MG783748	MG677323	none detected	Haugan, R.	Haugan ein49-4 (O L142064)	62.3747	10.0294	1100
Psora decipiens	clade 'A'	PS69	Norway, Oppland, Dovre		MG677201	MG677425	MG783627	MG783749	MG677324	none detected	Timdal, E.	Timdal 10528 (O L148957)	62.1002	9.62255	1050–1100
Psora decipiens	clade 'A'	PS70	Norway, Oppland, Lom		MG677202	MG677426	MG783628	MG783750	MG677325	none detected	Haugan, R.	Haugan høyro185c (O L145139)	61.6396	8.05092	950
Psora decipiens	clade 'A'	PS73	Norway, Hordaland, Ulvik		MG677203	MG677427	MG783629	MG783751		none detected	Pedersen, A.	26 July 2008, Pedersen (O L164310)	60.6077	7.55037	1445
Psora decipiens	clade 'A'	PS96	Sweden, Jämtland, Åre par.		MG677204	MG677428	MG783630	MG783752	-	not tested	Odelvik, G.	Odelvik 13-607 (S F254793)	63.3296	12.0774	731
Psora decipiens	clade 'A'	PS98	Sweden, Lycksele lappmark, Tärna par.		MG677205	MG677429	MG783631	MG783753	-	not tested	Odelvik, G., Hamnede, M. & Hedenäs, L.	Odelvik, Hamnede & Hedenäs 12586 (S F240198)	65.6828	14.6332	824
Psora decipiens	clade 'A'	PS99	Sweden, Pite lappmark, Arjeplog par.		MG677206	MG677430	MG783632	-	-	not tested	Odelvik, G.	Odelvik 06353 (S F60981)	66.7672	15.9036	723
Psora decipiens	clade 'B'	8792	Canada, Yukon Territory, near base of Sheep Mountain at south end of Kluane Lake		MG677208	MG677431	MG783633	MG783754	MG677326	not tested	Rosentreter, R.	Rosentreter 17165	61.0258	-138.505	NA
Psora decipiens	clade 'B'	PS54	Russia. Yakutia, Momski region		MG677209	MG677432	MG783634	-	-	none detected	Haugan R. & Timdal E.	16 July 1992, Haugan & Timdal YAK10/09 (O L18913)	65.3	143.167	440–460
Psora decipiens	clade 'B'	PS71	USA, North Dakota		MG677210	MG677433	MG783635	MG783755	-	none detected	Esslinger, T.	Esslinger 15401 [Lich. Sel. Exs. 331] (O L119961)	46.6	–103.4417	790
Psora decipiens	clade 'C'	8788	USA, Alaska, North Slope County		-	MG677434	MG783636	MG783756	MG677327	not tested	Rosentreter, R.	Rosentreter 15873 (SRP)	68.474	-161.008	NA
Psora decipiens	clade 'C'	PS108	Russia, Taymyr, Byrranga Mts, region of Lewinson-Lessing Lake		MG677211	MG677435	-	-	-	none detected	Zhurbenko, M. P.	Zhurbenko 94197 (UPS L-058857)	-74.6	-98.6	NA
Psora decipiens	clade 'C'	PS11	Austria. Salzburg, Pinzgau, Hochtor		MG677212	MG677436	MG783637	MG783757	MG677328	not tested	Westberg, M.	Westberg HOCH076 (S F262277)	47.0817	12.8487	2575
Psora decipiens	clade 'C'	PS12	Austria. Salzburg, Pinzgau, Hochtor		MG677213	MG677437	MG783638	MG783758	MG677329	none detected	Westberg, M.	Westberg HOCH042 (S F262440)	47.0827	12.8501	2567
Psora decipiens	clade 'C'	PS13	Austria. Salzburg, Pinzgau, Hochtor		MG677214	MG677438	MG783639	MG783759	MG677330	not tested	Westberg, M.	Westberg HOCH038 (S F262278	47.0817	12.8487	2575
Psora decipiens	clade 'C'	PS26	Austria. Salzburg, Pinzgau, Hochtor		MG677215	MG677439	MG783640	MG783760		not tested	Türk, R.	Türk 51479 (S F302607)	47.0825	12.8503	2575
Psora decipiens	clade 'D'	PS107	Russia. Sakha, Ordzhonikidzevskii region, Lenskie Stolby (= limestone cliffs by the river Lena, c. 165 km SW of Yakutsk)		MG677218	-	-	-	-	not tested	Zhurbenko, M. P.	Zhurbenko 92235 (UPS L-072282)	c. 61	(126–128)	NA
Psora decipiens	clade 'D'	PS113	Portugal, Lisboa, Sintra		MG677219	MG677442	MG783643	MG783763	-	none detected	Westberg, M. & Matos, P.	Westberg & Matos IBE004 (S F268407)	38.7278	–9.4762	5
Psora decipiens	clade 'D'	PS48	Greece, Westbern Crete		MG677221	MG677444	MG783645	MG783765	-	norstictic	Spribille, T.	Spribille 13421 (O L138747)	35.25	24.1667	5
Psora decipiens	clade 'D'	PS51	USA. Arizona, Maricopa Co.		MG677222	MG677445	-	MG783766	-	none detected	Rui, S. & Timdal, E.	Rui & Timdal US205/01 (O L59797)	33	–112.4333	500
Psora decipiens	clade 'D'	PS66	USA. Arizona, Gila Co.		MG677223	MG677446	MG783646	MG783767	MG677333	norstictic	Timdal, E.	Timdal US211/04 (O L59824)	34.2183	–111.3333	1525
Psora decipiens	clade 'D'	PS67	USA. California, Riverside Co.		MG677224	MG677447	MG783647	MG783768	MG677334	none detected	Timdal, E.	Timdal SON131/01 (O L60086)	33.66	–116.3983	530
Psora decipiens	clade 'D'	PS74	Mexico, Baja California		MG677225	MG677448	MG783648	MG783769		norstictic	Büdel, B.	23 Feb. 1993, Büdel 20211a (herb. Büdel)	30.05	–115.5833	230
Psora decipiens	clade 'D'	T51462	Spain. Andalucia, Almeria, Tabernas Badlands		MG677226	MG677449	MG783649	MG783770	-	not tested	Türk, R.	Türk 51462 (SZU)	37.0125	–2.4358	300
Psora decipiens	clade 'E'	8848	Australia, Western Australia, Yallari Timber Reserve, 28.5 km S of Coolgardie, 31¡06'19" S, 121¡23'53"E, elevation 390 m.		MG677228	MG677451	-	-	MG677335	not tested	Elix, J.A.	CANB 657767.1	32° 52' 23"	141° 37' 11"	NA
Psora decipiens	clade 'E'	8850	Australia, Western Australia, 25.3 km N of Kambalda East on road to Kalgoorlie, 31¡00'03" S, 121¡34'52"E, elevation 380 m.		MG677229	MG677452	-	MG783771	MG677336	not tested	Elix, J.A.	CANB 657785.1	33° 45' 47"	139° 07' 02"	NA
Psora decipiens	clade 'E'	8851	Australia, Western Australia, 47.4 km N of Coolgardie, 2 km N of Kintore, 30¡34'28" S, 121¡00'38"E, elevation 410 m.		MG677230	MG677453	-	-	MG677337	norstictic (major)	Elix, J.A.	CANB 760113.1	"31° 06' 19"	121° 23' 53"	NA
Psora decipiens	clade 'E'	8853	Australia, Western Australia, Southern Cross - Koolyanobbing road, 21.5 km S of Koolyanobbing, 30¡58'50" S, 119¡28'32"E, elevation 330 m.		-	MG677454	MG783650	MG783772	MG677338	not tested	Purdie, R.W. (6593)	CANB 773744.1	35° 53' 43"	149° 08' 15"	NA
Psora decipiens	clade 'E'	8854	Australia, Western Australia, Lookout between Koolyanobbing township and Dowd Hill, 30¡48'40" S, 119¡31'31"E, elevation 390 m.		MG677231	MG677455	-	MG783773	MG677339	norstictic (major); connorstictic (trace)	Elix, J.A.	CANB 790278.1	35° 10' 18"	139° 27' 57"	NA
Psora decipiens	clade 'E'	8855	Australia, Western Australia, Southern Cross - Koolyanobbing road, 21.5 km S of Koolyanobbing, 30¡58'50" S, 119¡28'32"E, elevation 330 m.		MG677232	MG677456	-	MG783774	MG677340	not tested	Elix, J.A.	CANB 790781.1	31° 22' 30"	118° 43' 02"	NA
Psora decipiens	clade 'E'	8856	Australia, Western Australia, Kalbarri National Park, Meanarra Hill, 5 km E of Kalbarri township 27¡41'51" S, 114¡13'02"E, elevation 200 m.		MG677233	MG677457	MG783651	-	MG677341	3_-hydroxy-4-O-demethylbarbatic (major); 3_-hydroxynorobtusatic (minor)	Elix, J.A.	CANB 790782.1	31° 15' 19"	119° 27' 15"	NA
Psora decipiens	clade 'E'	8859	Australia, New South Wales, Sivler City Highway, 152 km by road N of Wentworth, 32¡52'23" S, 141¡37'11"E, elevation 60 m.		MG677234	MG677458	-	MG783775	MG677342	hypoprotocetraric (major); 4-O-demethylnotatic (minor)	Elix, J.A.	CANB 790785.1	31° 00' 03"	121° 34' 52"	NA
Psora decipiens	clade 'E'	8860	Australia, New South Wales, Southern Tablelands, Scottsdale Bush Heritage Reserve, 4 km N of Bredbo, 35¡53'43" S, 149¡08'15"E, elevation 695 m.		MG677235	MG677459	MG783652	MG783776	MG677343	none detected	Elix, J.A.	CANB 790786.1	30° 30' 03"	121° 22' 08"	NA
Psora decipiens	clade 'E'	8861	Australia, New South Wales, South Far Western Plains, Balranald - Euston, 34¡37'33" S, 143¡27'37"E, elevation 69 m.			MG677460	-	MG783777	MG677344	norstictic (major); connorstictic (trace)	Elix, J.A.	CANB 790787.1	30° 34' 28"	121° 00' 38"	NA
Psora decipiens	clade 'E'	8862	Australia, South Australia, North Mount Lofty Ranges, 22 km SE of Burra along Highway 64, 33¡45'47" S, 139¡07'02"E, elevation 220 m.		-	MG677461	-	MG783778		norstictic (major)	Elix, J.A.	CANB 790788.1	30° 58' 50"	119° 28' 32"	NA
Psora decipiens	clade 'E'	8863	Australia, South Australia, 21 km NE of Blanchetown, 34¡16'04" S, 139¡47'59"E, elevation 30 m.		MG677236		-	-	-	none detected	Elix, J.A.	CANB 790789.1	30° 58' 50"	119° 28' 32"	NA
Psora decipiens	clade 'E'	8864	Australia, South Australia, Sturt Highway, 21 km NE of Blanchetown, 34¡16'04" S, 139¡47'59"E, elevation 30 m.		MG677237	MG677462	-	-	MG677345	hypoprotocetraric (major)	Elix, J.A.	CANB 790790.1	30° 48' 40"	119° 31' 31"	NA
Psora decipiens	clade 'E'	8865	Australia, South Australia, Ridley Conservation Park, N escarpment of Marne River Gorge, 14 km S of Swan Reach, 34¡41'11" S, 139¡32'35"E, elevation 45 m.		MG677238	MG677463	-	MG783779	MG677346	none detected	Elix, J.A.	CANB 790794.1	30° 41' 38"	116° 12' 20"	NA
Psora decipiens	clade 'E'	8866	Australia, Western Australia, Goongarrie Station, 30 km S of Menzies, 29¡58'55" S, 121¡01'34"E, elevation - m.		MG677239	MG677464	-	-	MG677347	none detected	Elix, J.A.	CANB 792029.1	34° 42' 26"	143° 32' 58"	NA
Psora decipiens	clade 'E'	8867	Australia, South Australia, 3 km S of Murray Bridge, small rise overlooking Murray River, 35¡07'35" S, 139¡17'09"E, elevation 20 m.		MG677240	MG677465	MG783653	MG783780	MG677348	none detected	Elix, J.A.	CANB 792081.1	34° 26' 11"	146° 26' 01"	NA
Psora decipiens	clade 'E'	8868	Australia, Victoria, Piangil Road, 3 km NE of Walpeup, 35¡07'13" S, 142¡03'01"E, elevation 75 m.		MG677241	MG677466	MG783654	MG783781		not tested	Elix, J.A.	CANB 793851.1	34° 16' 04"	139° 47' 59"	NA
Psora decipiens	clade 'E'	8869	Australia, Victoria, Murray-Sunset National Park, Sturt Highway, 30 km by road E of Paringa, 34¡16'28" S, 140¡00'47"E, elevation 35 m.		MG677242	MG677467	MG783655	MG783782	MG677349	not tested	Elix, J.A.	CANB 793852.1	34° 16' 04"	139° 47' 59"	NA
Psora decipiens	clade 'E'	8870	Australia, Victoria, 3 km W of Underbool, 35¡10'00" S, 141¡47'00"E, elevation 65 m.		MG677243	MG677468	-	MG783783	MG677350	not tested	Elix, J.A.	CANB 793854.1	34° 16' 04"	139° 47' 59"	NA
Psora decipiens	clade 'E'	8871	Australia, Western Australia, Ghooli, 15 km E of Southern Cross along the Great Eastern Highway, 31¡15'19" S, 119¡27'15"E, elevation - m.		MG677244	MG677469	MG783656	MG783784	MG677351	not tested	Elix, J.A.	CANB 793856.1	34° 16' 04"	139° 47' 59"	NA
Psora decipiens	clade 'E'	8872	Australia, Victoria, 2 km E of Murray Town along the Mallee Highway, 35¡15'55" S, 141¡12'43"E, elevation 55 m.		MG677245	MG677470	MG783657	-	MG677352	norstictic (major)	Elix, J.A.	CANB 793932.1	35° 07' 13"	142° 03' 01"	NA
Psora decipiens	clade 'E'	8873	Australia, Western Australia, Walebing, Quarrell Range, Moora - New Norcia Road, 22 km by road S of Moora, 30¡41'38" S, 116¡12'20"E, elevation 275 m.		MG677246	MG677471	-	-	MG677353	not tested	Elix, J.A.	CANB 795595.1	25° 20' 41"	131° 03' 21"	NA
Psora decipiens	clade 'E'	8874	Australia, South Australia, Sturt Highway, 21 km NE of Blanchetown, 34¡16'04" S, 139¡47'59"E, elevation 30 m.			MG677472	-	-	MG677354	not tested	Elix, J.A.	CANB 795647.1	34° 16' 28"	140° 00' 47"	NA
Psora decipiens	clade 'E'	8875	Australia, South Australia, Sturt Highway, 21 km NE of Blanchetown, 34¡16'04" S, 139¡47'59"E, elevation 30 m.		MG677247	MG677473	-	-	MG677355	not tested	Elix, J.A.	CANB 795731.1	34° 37' 46"	143° 31' 09"	NA
Psora decipiens	clade 'E'	8876	Australia, South Australia, Sturt Highway, 16 km W of Blanchetown, 34¡23'22" S, 139¡26'57"E, elevation 30 m.		MG677248	MG677474	MG783658	MG783785	MG677356	not tested	Elix, J.A.	CANB 797677.1	34° 23' 22"	139° 26' 57"	NA
Psora decipiens	clade 'E'	8877	Australia, South Australia, Sturt Highway, 16 km W of Blanchetown, 34¡23'22" S, 139¡26'57"E, elevation 30 m.		MG677249	MG677475	MG783659	MG783786	MG677357	not tested	Elix, J.A.	CANB 797678.1	34° 23' 22"	139° 26' 57"	NA
Psora decipiens	clade 'E'	8878	Australia, South Australia, Boundary Road, 10 km N of Tailem Bend, 35¡10'18" S, 139¡27'57"E, elevation 20 m.		MG677250	MG677476	MG783660	MG783787	MG677358	not tested	Elix, J.A.	CANB 799971.1	35° 07' 35"	139° 17' 09"	NA
Psora decipiens	clade 'E'	8879	Australia, Northern Territory, Central Australia South district, Mutitjulu, Uluru-Kata Tjuta National Park, 25¡20'41" S, 131¡03'21"E, elevation NA		MG677251	MG677477	MG783661	MG783788	MG677359	not tested	Elix, J.A.	CANB 810842.1	34° 33' 04"	143° 02' 38"	NA
Psora decipiens	clade 'E'	8881	Australia, New South Wales, S end of Melbergen Ridges, 21 km W of Rankins Springs, 33¡53'14" S, 146¡02'39"E, elevation 210 m.		MG677252	MG677479	MG783662	MG783789	MG677360	not tested	Elix, J.A.	CANB 810860.1	33° 53' 14"	146° 02' 39"	NA
Psora decipiens	clade 'E'	8883	Australia, New South Wales, Balranald District, 4 km S of Sturt Highway along the Tooleybuc Road, 34¡42'26" S, 143¡32'58"E, elevation 65 m.		MG677253	MG677480	MG783663	MG783790	MG677361	not tested	Elix, J.A.	CANB 810914.1	35° 15' 55"	141° 12' 43"	NA
Psora decipiens	clade 'E'	8884	Australia, New South Wales, Sturt Highway, 4 km W of Balranald, 34¡37'46" S, 143¡31'09"E, elevation 65 m.		MG677254	MG677481	-	MG783791	MG677362	not tested	Elix, J.A.	CANB 865198.1	34° 41' 11"	139° 32' 35"	NA
Psora decipiens	clade 'E'	8885	Australia, New South Wales, Sturt Highway, 30 km E of Euston, 34¡33'04" S, 143¡02'38"E, elevation 65 m.		MG677255	MG677482	-	-	-	not tested	Elix, J.A.	CANB 865869.1	29° 58' 55"	121° 01' 34"	NA
Psora decipiens	clade 'E'	8886	Australia, New South Wales, Sivler City Highway, 152 km by road N of Wentworth, 32¡52'23" S, 141¡37'11"E, elevation 60 m.		MG677256	MG677483	-	MG783792	MG677363	not tested	Schmidt-Leduhn, A.N. (1623)	CANB 867591.1	34° 37' 33"	143° 27' 37"	NA
Psora decipiens	clade 'E'	PS75	Australia, Northern Territory, James Ranges		MG677257	MG677484	MG783664	MG783793	-	norstictic	Büdel, B.	19 Aug. 1987, Büdel 18049a (herb. Büdel)	–24.3167	133.433	NA
Psora decipiens	clade 'Fa'	6763	USA, Nevada, Nye County, Sunnyside-Kirch Wildlife Management Area		MG677258	MG677485	MG783665	MG783794	MG677364	not tested	Leavitt, S.D.	Leavitt, S.D. 6763 (BRY-C)	38.4177	-115.024	NA
Psora decipiens	clade 'Fa'	8703	USA, Idaho, Clark County, Lemhi Valley		MG677259	MG677486	MG783666	MG783795	MG677365	not tested	Leavitt, S.D.	Leavitt, S.D. 13-LV-003 (BRY-C)	44.1097	-112.895	NA
Psora decipiens	clade 'Fa'	8715	Iran, East Azarbaijan, 14 km E of Hadishahr, Ersi village		MG677260	MG677487	-	-	MG677366	not tested	Sohrabi, M.S.	Herb. M. Sohrabi 16722	38.8247	45.7818	NA
Psora decipiens	clade 'Fa'	8717	Iran, East Azarbaijan, 14 km E of Hadishahr, Ersi village			MG677488	-	MG783796	MG677367	not tested	Sohrabi, M.S.	Herb. M. Sohrabi 16724	38.8247	45.7818	NA
Psora decipiens	clade 'Fa'	8793	USA, Colorado, Grand County, Kremmling		MG677261	MG677489	MG783667	MG783797	MG677368	not tested	Rosentreter, R.	Rosentreter s.n. (SRP)	40.0883	-106.414	NA
Psora decipiens	clade 'Fa'	PS52	USA, Utah, San Juan Co.		MG677262	MG677490	MG783668	MG783798		none detected	Rui, S & Timdal, E.	Rui & Timdal US242/02 (O L59938)	37.7017	–110.2367	1600
Psora decipiens	clade 'Fc'	8710	Iran, East Azarbaijan, 14 km E of Hadishahr, Ersi village		MG677267	MG677495	MG783672	MG783803	MG677369	not tested	Sohrabi, M.S.	Herb. M. Sohrabi 16670	38.8247	45.7818	NA
Psora decipiens	clade 'Fc'	8711	Iran, East Azarbaijan, 14 km E of Hadishahr, Ersi village		-	MG677496	MG783673	-	MG677370	not tested	Sohrabi, M.S.	Herb. M. Sohrabi 16717	38.8247	45.7818	NA
Psora decipiens	clade 'Fc'	8712	Iran, East Azarbaijan, 14 km E of Hadishahr, Ersi village		MG677268	MG677497	MG783674	-	MG677371	not tested	Sohrabi, M.S.	Herb. M. Sohrabi 16718	38.8247	45.7818	NA
Psora decipiens	clade 'Fc'	8713	Iran, East Azarbaijan, 14 km E of Hadishahr, Ersi village		MG677269	MG677498	-	-	MG677372	not tested	Sohrabi, M.S.	Herb. M. Sohrabi 16720	38.8247	45.7818	NA
Psora decipiens	clade 'Fc'	8714	Iran, East Azarbaijan, 14 km E of Hadishahr, Ersi village			MG677499	-	-	MG677373	not tested	Sohrabi, M.S.	Herb. M. Sohrabi 16721	38.8247	45.7818	NA
Psora decipiens	clade 'Fc'	8716	Iran, East Azarbaijan, 14 km E of Hadishahr, Ersi village		MG677270	MG677500	-	MG783804	MG677374	not tested	Sohrabi, M.S.	Herb. M. Sohrabi 16723	38.8247	45.7818	NA
Psora decipiens	clade 'Fc'	8787	USA, Washington, Benton County		MG677271	MG677501	MG783675	MG783805	MG677375	not tested	Rosentreter, R.	Rosentreter s.n. (SRP)	46° 14' 00"	119° 27' 00	NA
Psora decipiens	clade 'Fc'	8790	USA, Nevada, Clark County, Lake Mead area, near Las Vegas		MG677272	MG677502	MG783676	MG783806	MG677376	not tested	Rosentreter, R.	Rosentreter s.n. (SRP)	36.2159	-114.635	NA
Psora decipiens	clade 'Fc'	8794	USA, Nevada, Clark County, Corn Creek Field Station		MG677273	MG677503	MG783677	MG783807	MG677377	not tested	Rosentreter, R.	Rosentreter s.n. (SRP)	36.4415	-115.25	NA
Psora decipiens	clade 'Fc'	8937	USA, CO: Las Animas County, Comanche National Grassland, Purgatoire River Canyon, 37.570 -103.67		MG677274	MG677504	MG783678	MG783808	MG677378	not tested	Guarisco	Guarisco s.n. (TLE)	37.5686	-103.666	NA
Psora decipiens	clade 'Fc'	8938	USA, KS: Cheyenne County, St. Francis, 39.9085 N -101.7861		MG677275	MG677505	MG783679	MG783809	MG677379	not tested	Morse, C.	Morse 15566 (TLE)	39.9085	-39.9114	NA
Psora decipiens	clade 'Fc'	PS105	Russia, Komi, Itinsky, Yugd' Va National Park, about 2 km N of Baza Otdyha Orlinaya, left bank of Koshim river, about 65 km SSE of Inta railway station		MG677276	MG677506	MG783680	-	-	none detected?	Hermansson, J.	Hermansson 17553 (UPS L-531284)	65.439	60.6742	NA
Psora decipiens	clade 'Fc'	PS23	Spain. Andalucia, Almeria, Tabernas Badlands		MG677277	MG677507	MG783681	MG783810	-	not tested	Türk, R.	Türk 51464 (S F302610)	37.0125	–2.4358	300
Psora decipiens	clade 'Fc'	PS30	Spain. Andalucia, Almeria, Tabernas Badlands	large	MG677279	MG677509	MG783683	MG783812	-	hyposalazinic; hypostictic	Westberg, M.	Westberg SCIN187 (S F283445)	37.0135	–2.4357	300
Psora decipiens	clade 'Fc'	PS43	Spain. Madrid, Aranjuez, Finca Sotomayor		MG677280	MG677510	MG783684	MG783813	-	hyposalazinic; hypostictic	Westberg, M. & Williams, L.	Westberg & Williams (S F302605)	40.0363	–3.5534	530
Psora decipiens	clade 'Fc'	PS45	Spain. Madrid, Aranjuez, Finca Sotomayor		MG677281	MG677511	MG783685	MG783814	-	none detected	Westberg, M. & Williams, L.	Westberg & Williams (S F283536)	40.0363	–3.5534	530
Psora decipiens	clade 'Fc'	PS53	Russia. Yakutia, Ordzhonikidzevskii region		MG677282	MG677512	MG783686	MG783815	-	hyposalazinic; hypostictic	Haugan, R. & Timdal, E.	July 1992, Haugan & Timdal YAK01/95 (O L18517)	61.0667	127.483	80–200
Psora decipiens	clade 'Fc'	PS68	USA. Utah, San Juan Co.		MG677283	MG677513	MG783687	MG783816	MG677380	hyposalazinic; hypostictic	Rui, S. & Timdal, E.	Rui & Timdal US241/02 (O L59932)	37.5867	–110.?	1800
Psora decipiens	clade 'Fc'	PS77	USA, Arizona, Coconino Co.		MG677284	MG677514	MG783688	MG783817	-	none detected	Rui, S. & Timdal, E.	Rui & Timdal US244/05 (O L59954)	36.935	–111.4767	1200
Psora decipiens	clade 'Ga'	8939	USA, KS, Cowley County, Cowley State Fishing Lake, 37.10 -96.805		MG677288	MG677518	MG783690	MG783821	MG677381	not tested	Advaita	Advaita 2442 (TLE)	37.1	-96.8053	NA
Psora decipiens	clade 'Ga'	8940	USA, KS, Neosho County, Neosho State Fishing Lake, 37.42 -95.196		MG677289	MG677519	MG783691	-	MG677382	not tested	Advaita	Advaita 2930 (TLE)	37.4193	-95.1962	NA
Psora decipiens	clade 'Ga'	51458	Spain. Andalucia, Almeria, Tabernas Badlands		MG677285	MG677515	-	MG783818		not tested	Türk, R.	Türk 51458 (SZU)	37.0125	–2.4358	300
Psora decipiens	clade 'Ga'	51465	Spain. Andalucia, Almeria, Tabernas Badlands		MG677286	MG677516	-	MG783819	-	not tested	Türk, R.	Türk 51465 (SZU)	37.0125	–2.4358	300
Psora decipiens	clade 'Ga'	51466	Spain. Andalucia, Almeria, Tabernas Badlands		MG677287	MG677517	MG783689	MG783820	-	not tested	Türk, R.	Türk 51466 (SZU)	37.0125	–2.4358	300
Psora decipiens	clade 'Ga'	PS06	Spain. Andalucia, Almeria, Tabernas Badlands		MG677292	MG677522	MG783694	MG783824	MG677385	none detected	Westberg, M.	Westberg SCIN071 (S F262778)	37.0128	–2.4359	300
Psora decipiens	clade 'Ga'	PS08	Spain. Andalucia, Almeria, Tabernas Badlands	small	MG677293	MG677523	MG783695	MG783825	MG677386	not tested	Westberg, M.	Westberg SCIN075 (S F262777)	37.0135	–2.4357	300
Psora decipiens	clade 'Ga'	PS10	Spain. Andalucia, Almeria, Tabernas Badlands	small	MG677294	MG677524	MG783696	MG783826	MG677387	not tested	Westberg, M.	Westberg SCIN079 (S F262779)	37.0142	–2.4368	300
Psora decipiens	clade 'Ga'	PS24	Spain. Andalucia, Almeria, Tabernas Badlands		MG677300	MG677530	MG783702	MG783831		not tested	Türk, R.	Türk 51464 (S F302609)	37.0125	–2.4358	300
Psora decipiens	clade 'Ga'	PS25	Spain. Andalucia, Almeria, Tabernas Badlands		MG677301	MG677531	MG783703	MG783832	-	not tested	Türk, R.	Türk 51464 (S F302608)	37.0125	–2.4358	300
Psora decipiens	clade 'Ga'	PS38	Spain. Andalucia, Almeria, Tabernas Badlands		MG677304	MG677534	MG783706	MG783835	-	not tested	Westberg, M.	Westberg SCIN188 (S F283443)	37.0135	–2.4357	300
Psora decipiens	clade 'Ga'	PS39	Spain. Andalucia, Almeria, Tabernas Badlands		MG677305	MG677535	MG783707	MG783836	-	none detected	Westberg, M.	Westberg SCIN189 (S F283442)	37.0135	–2.4357	300
Psora decipiens	clade 'Ga'	PS40	Spain. Andalucia, Almeria, Tabernas Badlands		MG677306	MG677536	MG783708	MG783837	-	norstictic	Westberg, M.	Westberg SCIN190 (S F283439)	37.0129	–2.4364	300
Psora decipiens	clade 'Ga'	PS49	Greece, Psiloritis Mtns		MG677308	MG677538	MG783710	MG783838	-	none detected	Spribille, T.	Spribille 13596 (O L138746)	35.1406	24.9014	550
Psora decipiens	clade 'Gb'	AY425633	Germany, Bavaria, Benediktbeuren		AY425633	-	-	-	-	not tested	Kainz, C.	Kainz219 (M 0066790)	-47.7	-11.4	NA
Psora decipiens	clade 'Gb'	EF524326	Greenland, Narsaq municipality: Narsarsuaq, Sutuluaqqap Qaqqaa		EF524326	-	-	EF524337	-	not tested	Timdal, E.	Timdal 10078 (O L139100)	61.1555	–45.3991	370
Psora decipiens	clade 'Gb'	HQ650619	NA	NA	HQ650619	-	-	-	-	not tested		AFTOL-ID 1032	NA	NA	NA
Psora decipiens	clade 'Gb'	PS01	Germany. Bavaria, Lower Franconia, Main-Spessart Distr., Gössenheim		MG677290	MG677520	MG783692	MG783822	MG677383	not tested	Westberg, M.	Westberg GOS001 (S F262723)	50.0269	9.8004	300
Psora decipiens	clade 'Gb'	PS02	Germany. Bavaria, Lower Franconia, Main-Spessart Distr., Gössenheim		MG677291	MG677521	MG783693	MG783823	MG677384	not tested	Westberg, M.	Westberg GOS002 (S F262724)	50.0269	9.8004	300
Psora decipiens	clade 'Gb'	PS110	Sweden, Gotland, Kräklingbo par.		MG677295	MG677525	MG783697	MG783827		not tested	Westberg, M.	Westberg, Kosuthova & Prieto GTL10 (S F267988)	57.4386	18.7402	10–50
Psora decipiens	clade 'Gb'	PS111	Portugal, Lisboa, Sintra		MG677296	MG677526	MG783698	-	-	none detected	Westberg, M. & Matos, P.	Westberg & Matos IBE005 (S F268408)	38.8614	–9.44241	50
Psora decipiens	clade 'Gb'	PS112	Spain, Madrid, Pinilla municipality		MG677297	MG677527	MG783699	MG783828	-	none detected	Westberg, M.	Westberg, Millanes & Amo de Paz IBE028 (S F268431)	40.9218	–3.8135	1100
Psora decipiens	clade 'Gb'	PS16	Sweden. Öland, Resmo par.		MG677298	MG677528	MG783700	MG783829	MG677388	none detected	Westberg, M.	Westberg GYN030 (S F257008)	56.5431	16.4788	30
Psora decipiens	clade 'Gb'	PS17	Sweden. Öland, Resmo par.		MG677299	MG677529	MG783701	MG783830	MG677389	not tested	Westberg, M.	Westberg GYN056 (S F257038)	56.5436	16.4772	30
Psora decipiens	clade 'Gb'	PS35	Sweden. Öland, Resmo par.		MG677302	MG677532	MG783704	MG783833		not tested	Westberg, M.	Westberg GYN047 (S F257029)	56.54	16.4786	30
Psora decipiens	clade 'Gb'	PS36	Sweden. Öland, Resmo par.		MG677303	MG677533	MG783705	MG783834	-	not tested	Westberg, M.	Westberg GYN046 (S F257028)	56.5436	16.4772	30
Psora decipiens	clade 'Gb'	PS42	Bulgaria, Haskovo region, Boliarovo, W Strandzha Mts: E slopes of Sivri bair peak, 0.97 km W (278°) of the settlement.		MG677307	MG677537	MG783709	-	-	not tested	Palpurina, S.	Palpurina STBG12-08 (UPS L-817075)	42.0057	26.8493	435
Psora decipiens	clade 'Gb'	PS50	Greece, Kaválla, Thassos		MG677309	MG677539	MG783711	MG783839	-	norstictic	Rui, S. & Timdal, E.	Rui & Timdal TH15/03 (O L59291)	40.62	24.66	80
Psora decipiens	clade 'Gb'	PS56	Norway, Telemark, Bamble		MG677310	MG677540	MG783712	MG783840	-	none detected	Haugan, R & Reiso, S	Haugan & Reiso 8223 (O L160435)	58.9998	9.7308	10
Psora decipiens	clade 'Gb'	PS57	Norway, Nordland, Fauske		MG677311	MG677541	MG783713	MG783841	-	none detected	Klepsland, J.	Klepsland JK09-L221 (O L164756)	67.2449	15.5214	80
Psora decipiens	clade 'Gb'	PS63	Greece, Kaválla, Thassos		MG677312	MG677542	MG783714	MG783842	MG677390	norstictic	Rui, S. & Timdal, E.	Rui & Timdal TH06/03 (O L59262)	40.7017	24.6617	590
Psora decipiens	clade 'Gb'	PS64	Norway, Nordland, Alstahaug		MG677313	MG677543	MG783715	MG783843	MG677391	none detected	Haugan, R.	Haugan blom407 (O L135707)	65.8729	12.2731	1–10
Psora decipiens	clade 'Gb'	PS72	Sweden, Uppland, Djurö par.		MG677314	MG677544	MG783716	MG783844		not tested	Westberg, M.	Westberg s.n. (S F214260)	59.2761	18.7774	5
Psora decipiens	clade 'Gb'	PS76	USA, California, San Bernardino Co		MG677315	MG677545	MG783717	MG783845	-	none detected	Rui, S & Timdal, E.	Rui & Timdal US259/01	34.3617	–117.605	1700
Psora decipiens	p_cren_B	PS106	Yemen, Al Mahrah, escarpment NE of Hawf		MG677170	MG677396	MG783597	-	-	norstictic	Thulin, M., Beier, B.-A. & M. A. Hussein	Thulin, Beier & Hussein 9788 (UPS L-104533)	-16.65	-53.05	NA
Psora decipiens	clade 'D'	PS07	Spain. Andalucia, Almeria, Tabernas Badlands	large	MG677216	MG677440	MG783641	MG783761	MG677331	none detected	Westberg, M.	Westberg SCIN073 (S F262776)	37.0125	–2.4357	300
Psora decipiens	clade 'D'	PS09	Spain. Andalucia, Almeria, Tabernas Badlands	large	MG677217	MG677441	MG783642	MG783762	MG677332	none detected	Westberg, M.	Westberg SCIN077 (S F262775)	37.0135	–2.4361	300
Psora decipiens	clade 'D'	PS27	Spain. Andalucia, Almeria, Tabernas Badlands	large	MG677220	MG677443	MG783644	MG783764		none detected	Westberg, M.	Westberg SCIN204 (S F283440)	37.0129	–2.4364	300
Psora decipiens	clade 'Fc'	PS28	Spain. Andalucia, Almeria, Tabernas Badlands	large	MG677278	MG677508	MG783682	MG783811	-	hyposalazinic; hypostictic	Westberg, M.	Westberg SCIN186 (S F283444)	37.0135	–2.4357	300
Psora saviczii	clade 'Fb'	ALM77	Spain. Madrid, Aranjuez, Finca Sotomayor		MG677263	MG677491	MG783669	MG783799	-	none detected	Westberg, M. & Williams, L.	Westberg & Williams s.n. (S F302604)	-40.0363	(–3.5534)	530
Psora saviczii	clade 'Fb'	PS103	Russia, Astrakhan, Bogdinsko-Baskunchasky Zapovednik, Vak-Tau hills, E of lake Baskunchak, 22,7 km E of Verkhniy Baskunchak, 62.9 km ESE of Akthubinsk		MG677264	MG677492	-	-	-	none detected	Hermansson, J.	Hermansson 16431 (UPS L-173231)	48.246	47.024	NA
Psora saviczii	clade 'Fb'	PS44	Spain. Madrid, Aranjuez, Finca Sotomayor		MG677265	MG677493	MG783670	MG783800	-	none detected	Westberg, M. & Williams, L.	Westberg & Williams s.n. (S F283535)	40.0363	–3.5534	530
Psora saviczii	clade 'Fb'	PS46	Spain. Madrid, Aranjuez, Finca Sotomayor		MG677266	MG677494	MG783671	MG783801	-	not tested	Westberg, M. & Williams, L.	Westberg & Williams s.n. (S F283532)	40.0363	–3.5534	530
Psora tuckermanii	-	8701	USA, Nevada, Nye County, Sunnyside-Kirch Wildlife Management Area		MG677165	MG677392	-	-	MG677316	not tested	Leavitt, S.D. & St. Clair, L. L.	Leavitt, S.D. 8701 (BRY-C)		NA	NA
